# Supplementary material for: Surface-Bound and Volatile Mo Oxides Produced During Oxidation of Single MoS2 Crystals in Air and High Relative Humidity
Source: PubMed Central journal article supplement (PMC7412186; doi:10.3390/ma13143067), 2020-07-09
Supplement: materials-13-03067-s001.pdf [file materials-13-03067-s001.pdf]

# Supplementary Materials: Surface-Bound and Volatile Mo Oxides Produced During Oxidation of Single MoS<sub>2</sub> Crystals in Air and High Relative Humidity

Robert Szoszkiewicz <sup>1,\*</sup>, Maciej Rogala <sup>2</sup> and Paweł Dąbrowski <sup>2</sup>

<sup>1</sup> Faculty of Chemistry, Biological and Chemical Research Centre, University of Warsaw, Żwirki i Wigury 101, 02-089 Warsaw, Poland.

<sup>2</sup> Department of Solid State Physics, Faculty of Physics and Applied Informatics, University of Lodz, Pomorska 149/153, 90-236 Lodz, Poland.

\* correspondence: rszoszkiewicz@chem.uw.edu.pl

Below, we produce several more examples of scratching out a thin oxide layer during contact-mode AFM scanning at room temperature from previously thermally oxidized single MoS<sub>2</sub> flakes.

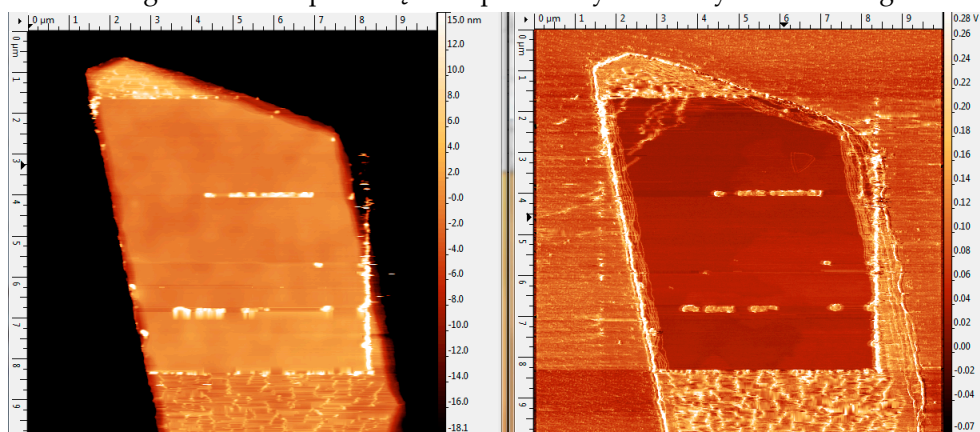

**Figure S1.** An example of creating ripples and scratching out an already fragmented oxide layer (due to extensive heating). Left: topography; Right: twice the uncalibrated friction.

AFM contact mode imaging, 10 μm by 10 μm. In the central zone of the MoS<sub>2</sub> flake heated extensively at 350 °C 6.6 μm by 6.6 μm area has been scratched out at room temperature. Figure S2 shows the progression of scratching out the oxide layer.

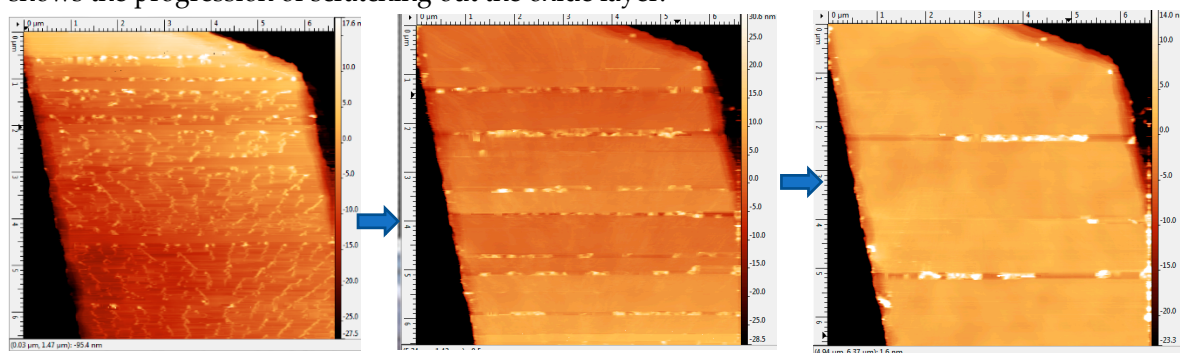

**Figure S2.** Progression of the process of removing already loosely bound oxides from the flake in Figure S1. Presented are 6.6 μm by 6.6 μm AFM contact mode topography images.

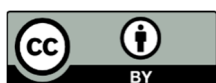

© 2020 by the authors. Submitted for possible open access publication under the terms and conditions of the Creative Commons Attribution (CC BY) license (<http://creativecommons.org/licenses/by/4.0/>).
